# Supplementary material for: Gut Commensal-Induced IκBζ Expression in Dendritic Cells Influences the Th17 Response
Source: PubMed Central journal article supplement (PMC7851057; doi:10.3389/fimmu.2020.612336), 2021-01-19
Supplement: Image_1.pdf [file Image_1.pdf]

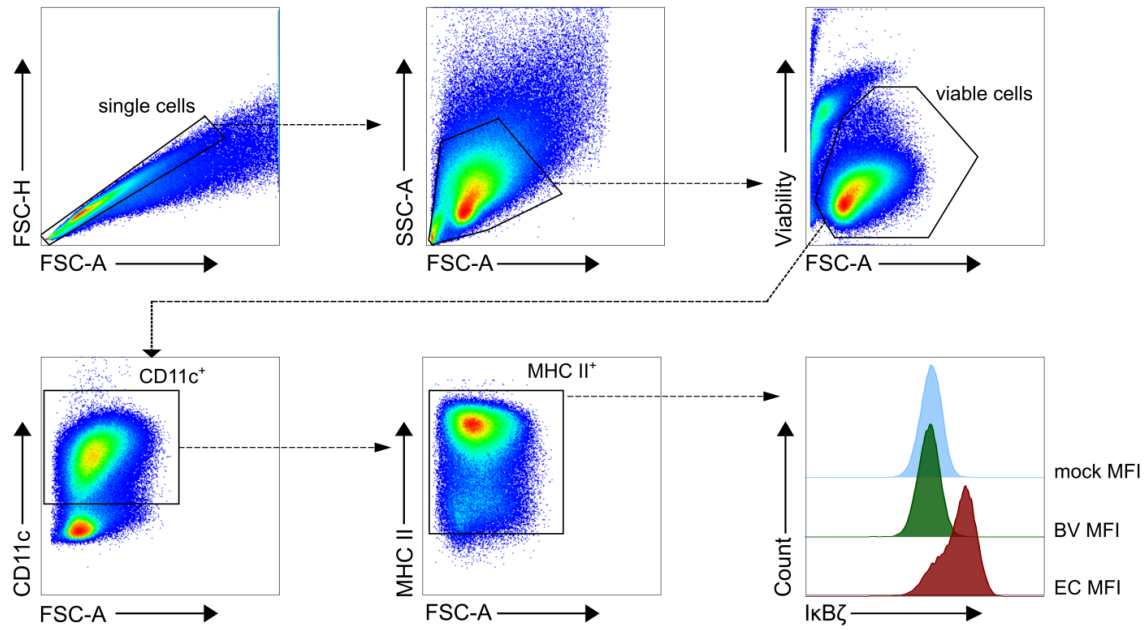

**Supplementary Figure 1: Gating strategy applied for the flow cytometry analysis of bone marrow derived dendritic cells (BMDCs).** In order to quantify IκBζ protein levels in BMDCs, cell doublets (FSC-A/FSC-H), cell debris (FSC-A/SSC-A) and dead cells (fixable viability dye<sup>+</sup>) were excluded from further analysis. Mean fluorescence of IκBζ was determined in CD11c<sup>+</sup> MHCII<sup>+</sup> BMDCs. Here, representative histograms for IκBζ MFI in BMDCs stimulated with PBS (mock), *B. vulgatus* (BV) and *E. coli* (EC) are depicted.
