# Supplementary material for: Gut Commensal-Induced IκBζ Expression in Dendritic Cells Influences the Th17 Response
Source: PubMed Central journal article supplement (PMC7851057; doi:10.3389/fimmu.2020.612336), 2021-01-19
Supplement: Image_2.pdf [file Image_2.pdf]

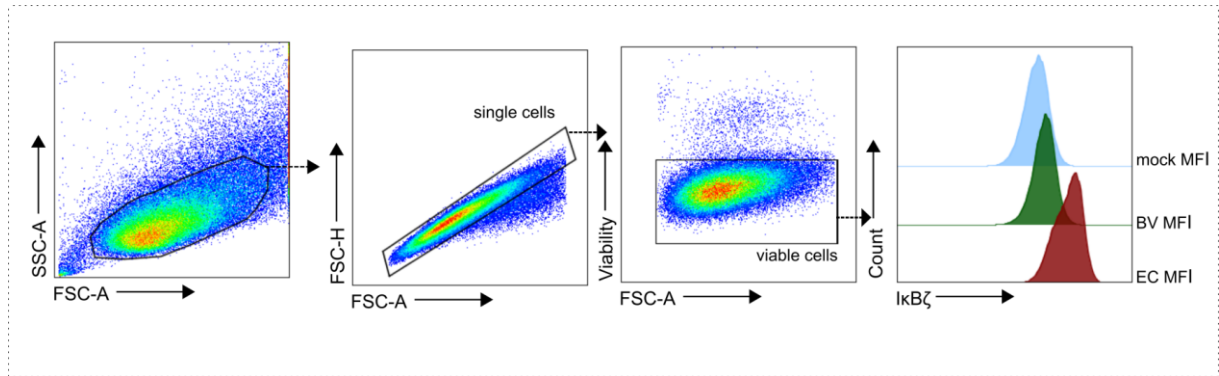

**Supplementary Figure 2: Gating strategy applied for the flow cytometry analysis of mICc12 cells.** In order to quantify IκBζ protein levels in mICc12 cells, cell debris (FSC-A/SSC-A), cell doublets (FSC-A/FSC-H) and dead cells (fixable viability dye<sup>+</sup>) were excluded from further analysis. Mean fluorescence of IκBζ was determined in single, viable cells. Depicted here are representative histograms for IκBζ MFI in mICc12 cells stimulated with PBS (mock), *B. vulgatus* (BV) and *E. coli* (EC).
