# Supplementary material for: Gut Commensal-Induced IκBζ Expression in Dendritic Cells Influences the Th17 Response
Source: PubMed Central journal article supplement (PMC7851057; doi:10.3389/fimmu.2020.612336), 2021-01-19
Supplement: Image_3.pdf [file Image_3.pdf]

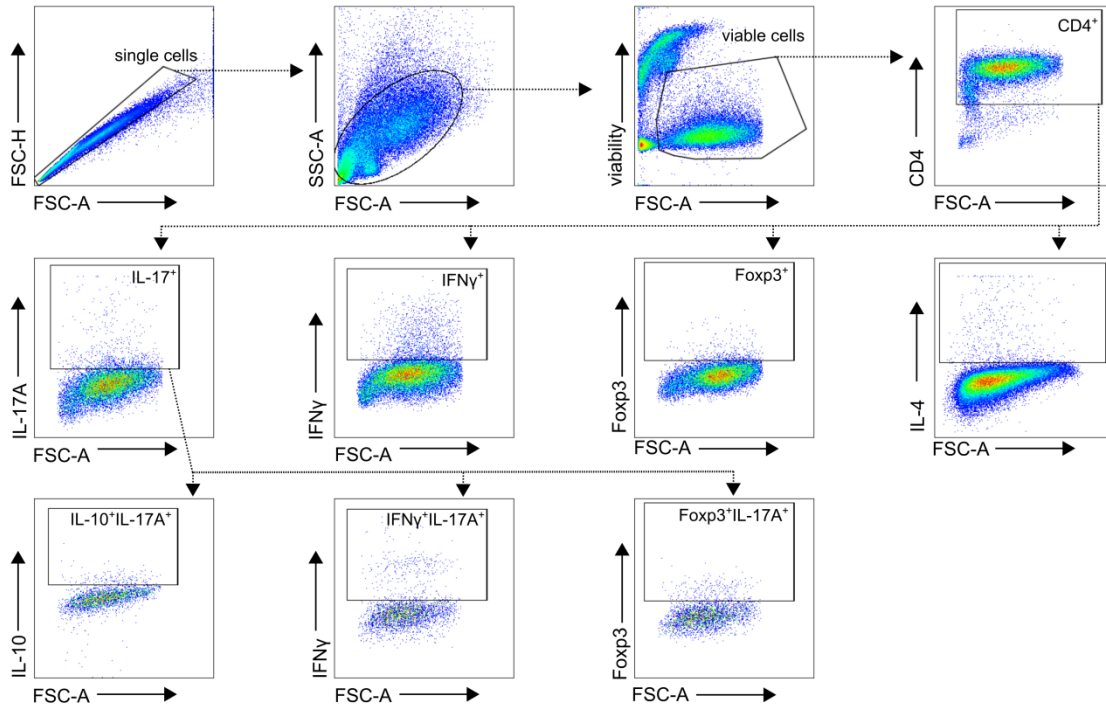

**Supplementary Figure 3: Gating strategy applied for the flow cytometry analysis of CD4<sup>+</sup> T cell subsets.** In order to analyze different CD4<sup>+</sup> T cell subsets, cell doublets (FSC-A/FSC-H), cell debris (FSC-A/SSC-A), and dead cells (fixable viability dye<sup>+</sup>) and CD4<sup>-</sup> cells were excluded from further analysis. Subsets were determined with specific gates set according to FMO controls.
