# Supplementary material for: Gut Commensal-Induced IκBζ Expression in Dendritic Cells Influences the Th17 Response
Source: PubMed Central journal article supplement (PMC7851057; doi:10.3389/fimmu.2020.612336), 2021-01-19
Supplement: Image_6.pdf [file Image_6.pdf]

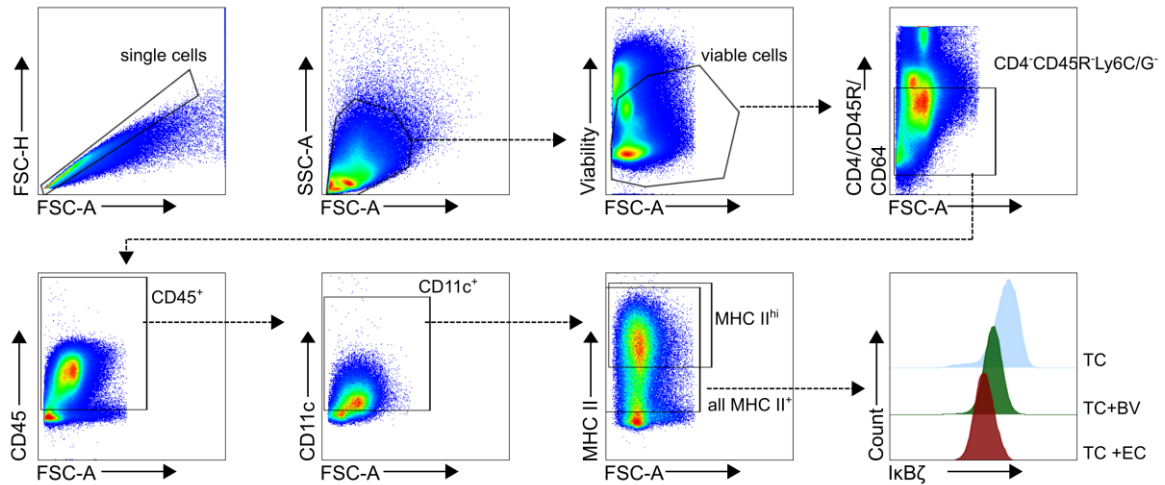

**Supplementary Figure 6: Gating strategy for flow cytometry analysis of cLP and mLN DCs.** Cells were isolated from cLP and mLN of gnotobiotic WT mice or T cell transplanted *Rag1*<sup>-/-</sup> mice from experiments described in Fig. 4 and Fig. 5. In order to quantify IκBζ protein levels in DCs, cell doublets (FSC-A/FSC-H), cell debris (FSC-A/SSC-A), dead cells (fixable viability dye<sup>+</sup>) and CD4<sup>+</sup>CD45R<sup>+</sup>Ly6C/G<sup>+</sup> cells were excluded from further analysis. CD45<sup>+</sup>CD11c<sup>+</sup> cells were regarded as DCs and mean fluorescence of IκBζ was determined in MHC II<sup>+</sup> DC and MHC II<sup>hi</sup> DC populations. Here, representative histograms for IκBζ MFI in MHC II<sup>+</sup> DCs isolated from T cell transplanted (TC) mice without or with *B. vulgatus* (TC + BV) or *E. coli* (TC + EC) administration are depicted.
